# Supplementary material
Source: PubMed Central journal article supplement (PMC3719646)
Supplement: JCM.00802-13_zjm999092722so1.pdf [file JCM.00802-13_zjm999092722so1.pdf]

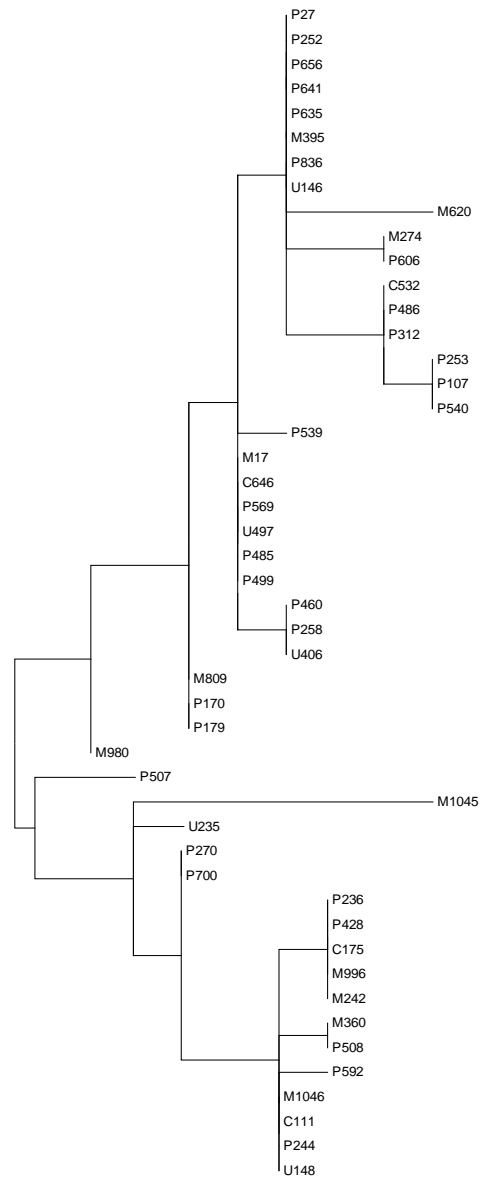

*acsA* gene

Fig S1

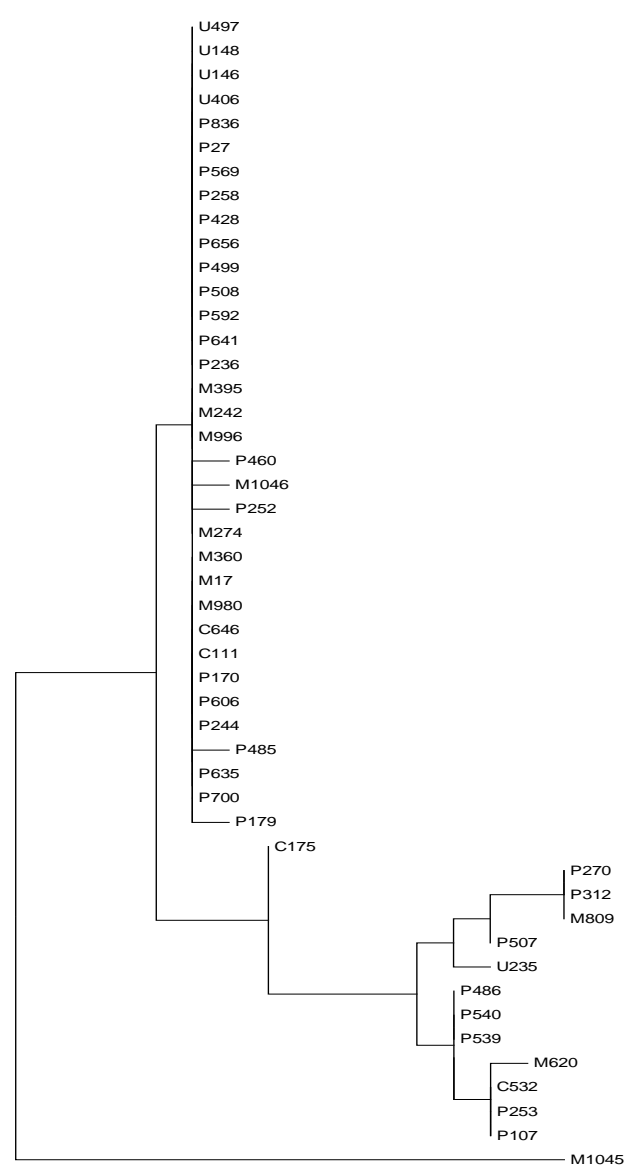

*aroE* gene

Fig S2

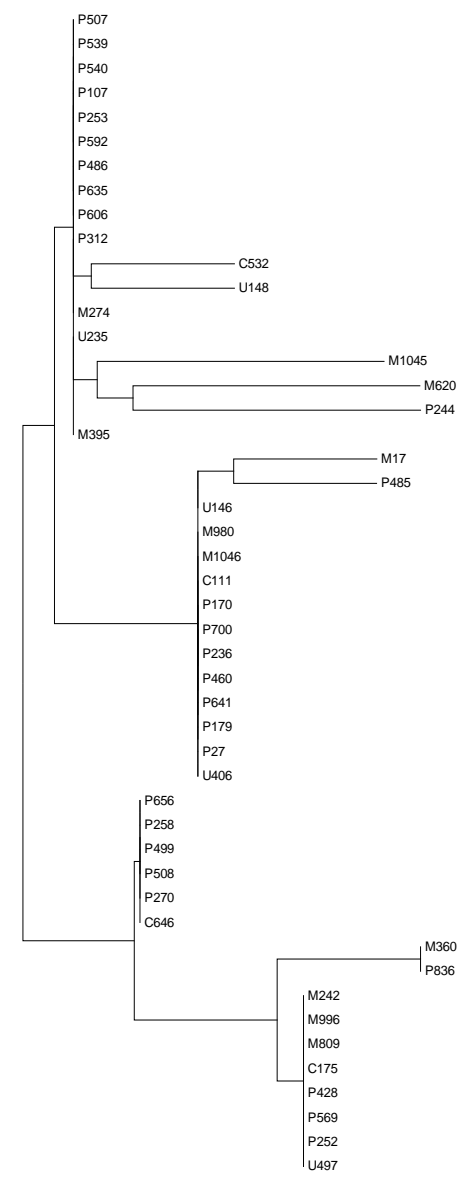

*nuoD* gene

Fig S3

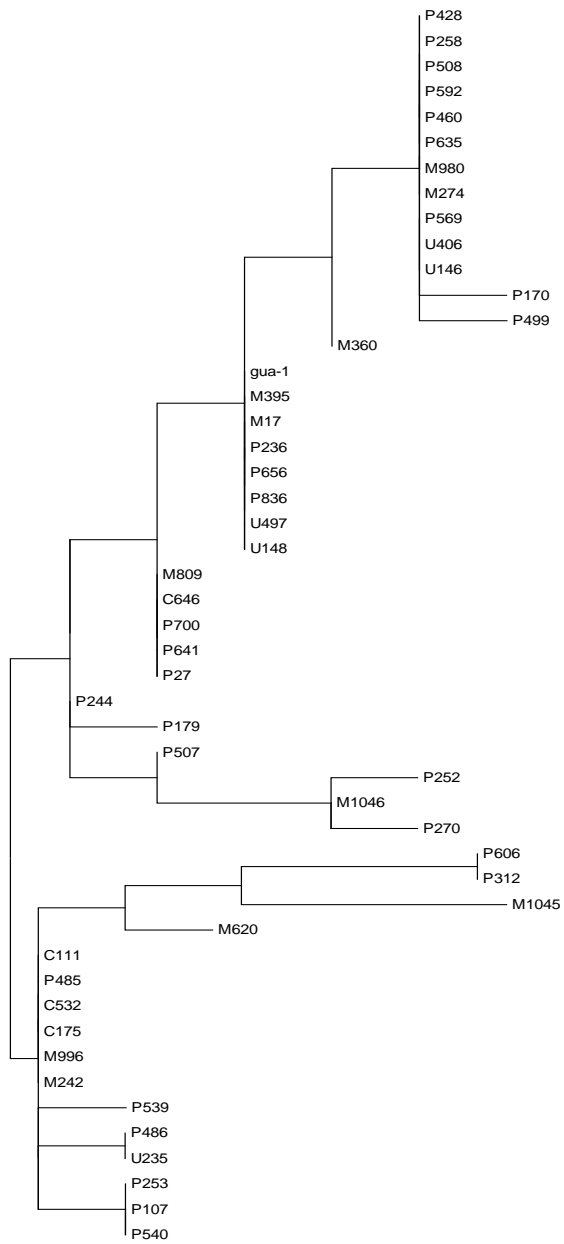

*guaA* gene  
Fig S4

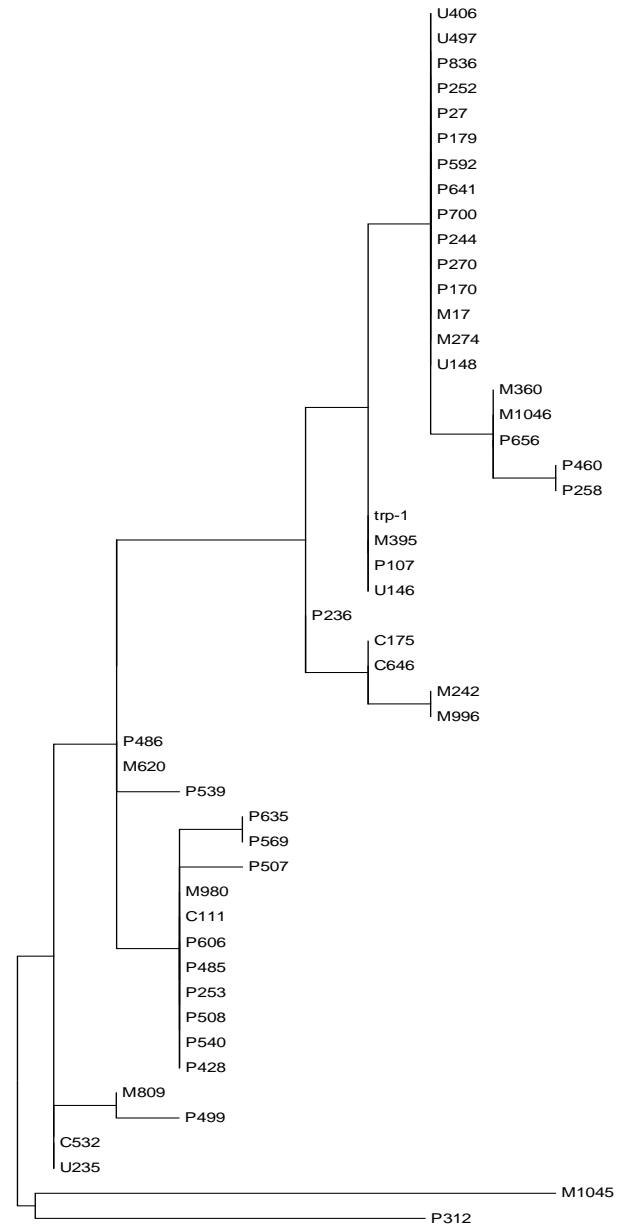

*trpE* gene  
Fig S5

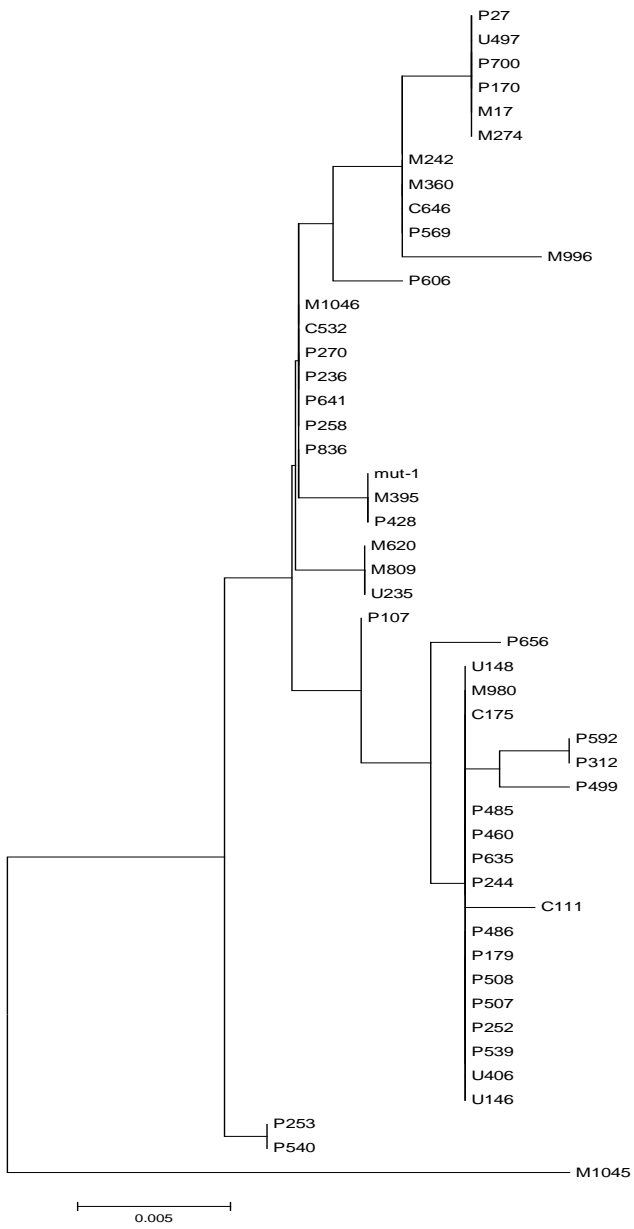

*mutL* gene

Fig S6

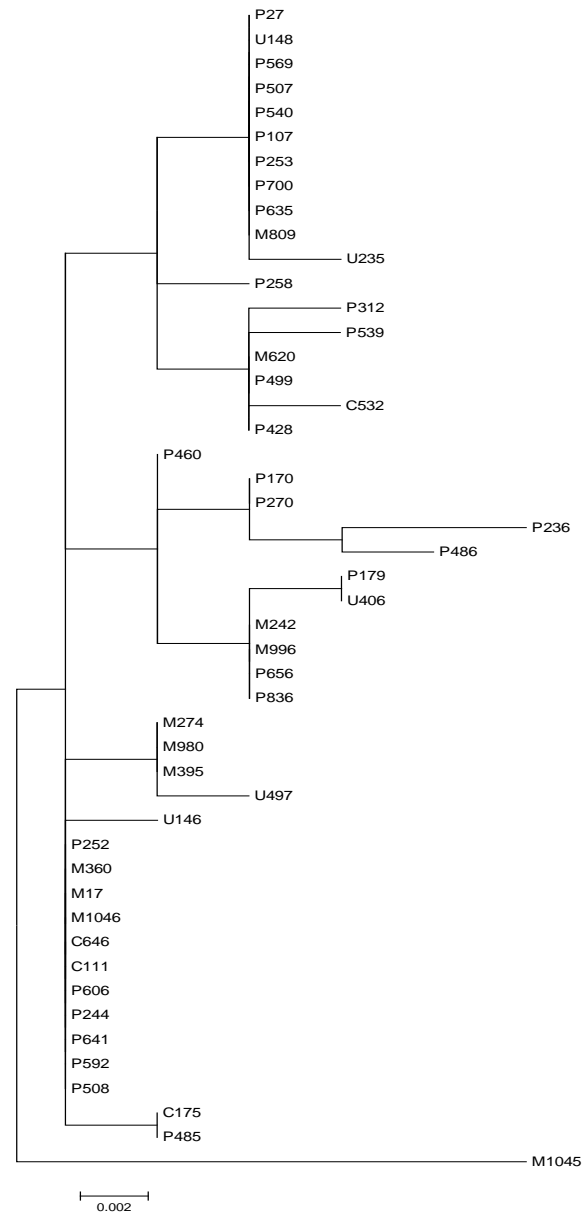

*ppsA* gene

Fig S7
